# Supplementary material for: Effect of TAVR Approach and Other Baseline Factors on the Incidence of Acute Kidney Injury: A Systematic Review and Meta-Analysis
Source: Hindawi journal article supplement (doi:10.1155/2022/3380605), 2022-10-27

Supplemental figure 1: Meta-analysis of atrial fibrillation in predicting post-TAVR AKI

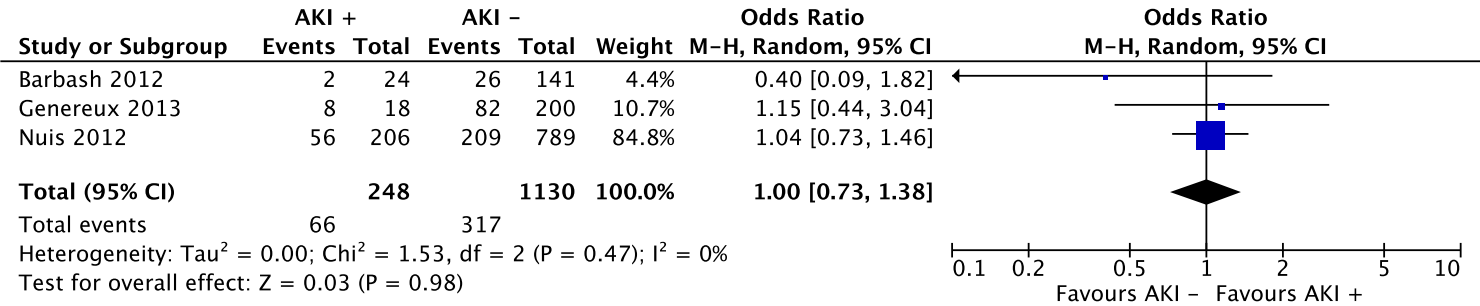

**Supplemental figure 2: Meta-analysis of blood transfusion in predicting post-TAVR AKI**

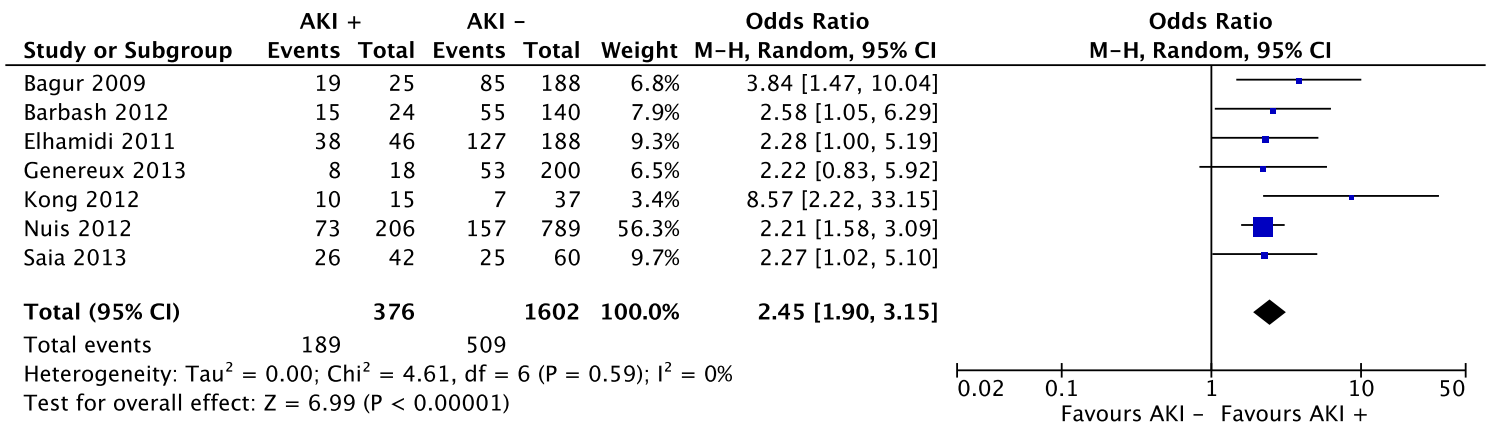

**Supplemental figure 3: Meta-analysis of coronary artery disease in predicting post-TAVR AKI**

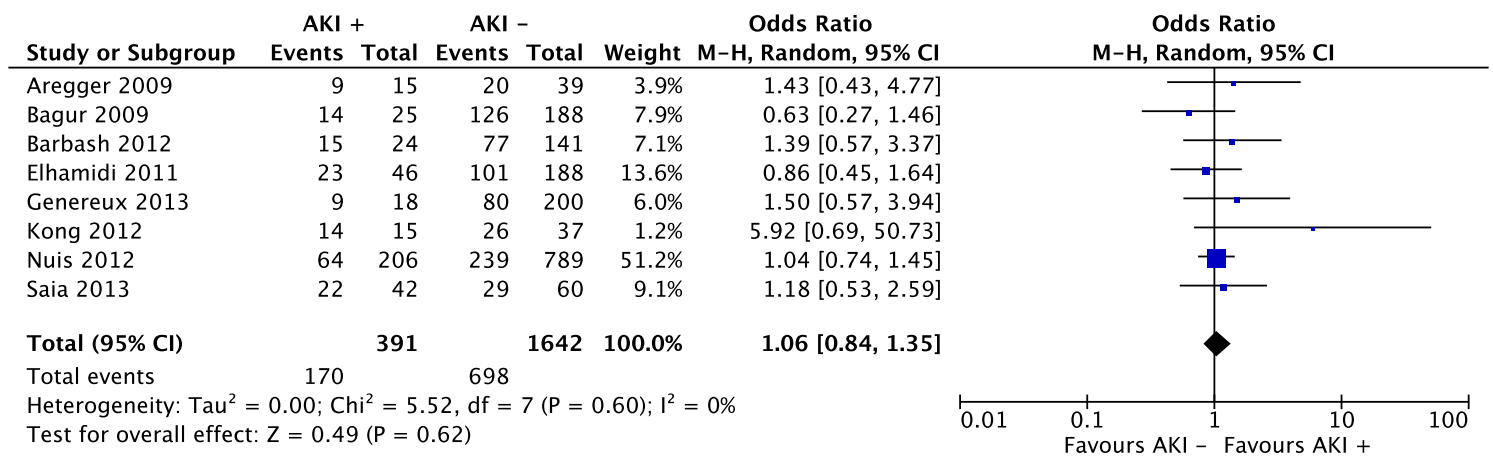

Supplemental figure 4: Meta-analysis of congestive heart failure in predicting post-TAVR AKI

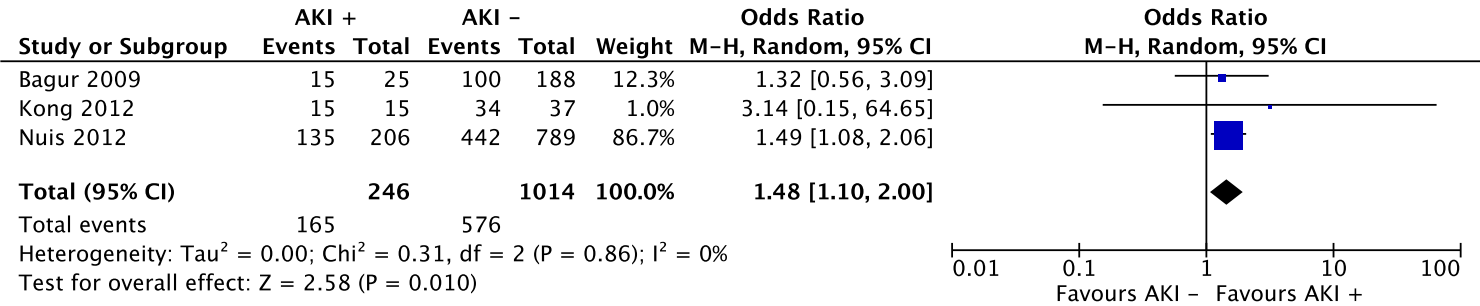

**Supplemental figure 5: Meta-analysis of diabetes mellitus in predicting post-TAVR AKI**

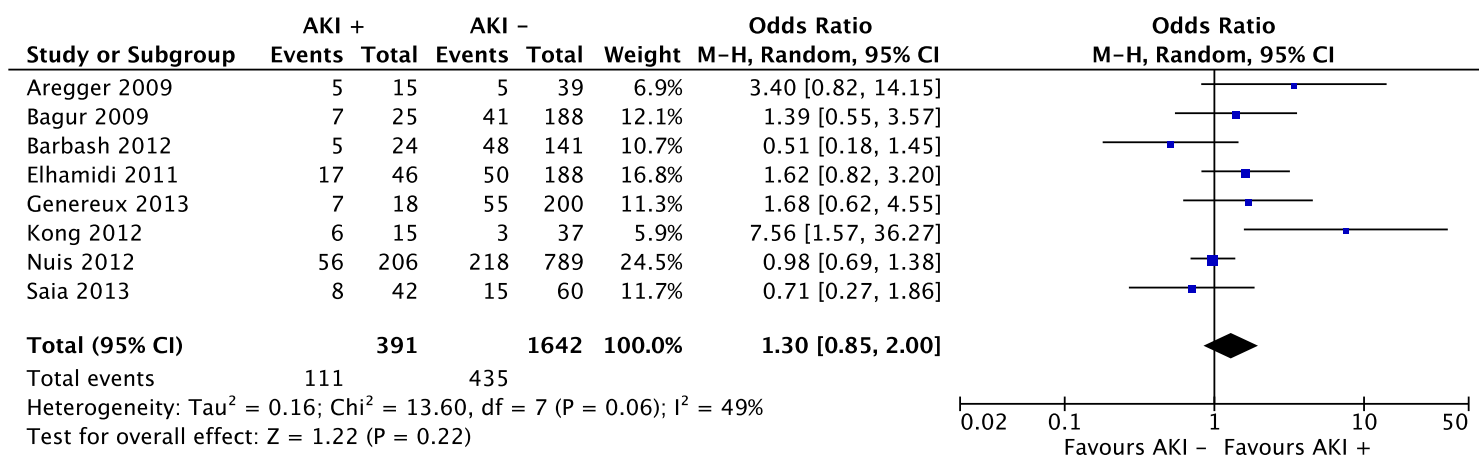

**Supplemental figure 6: Meta-analysis of hypertension in predicting post-TAVR AKI**

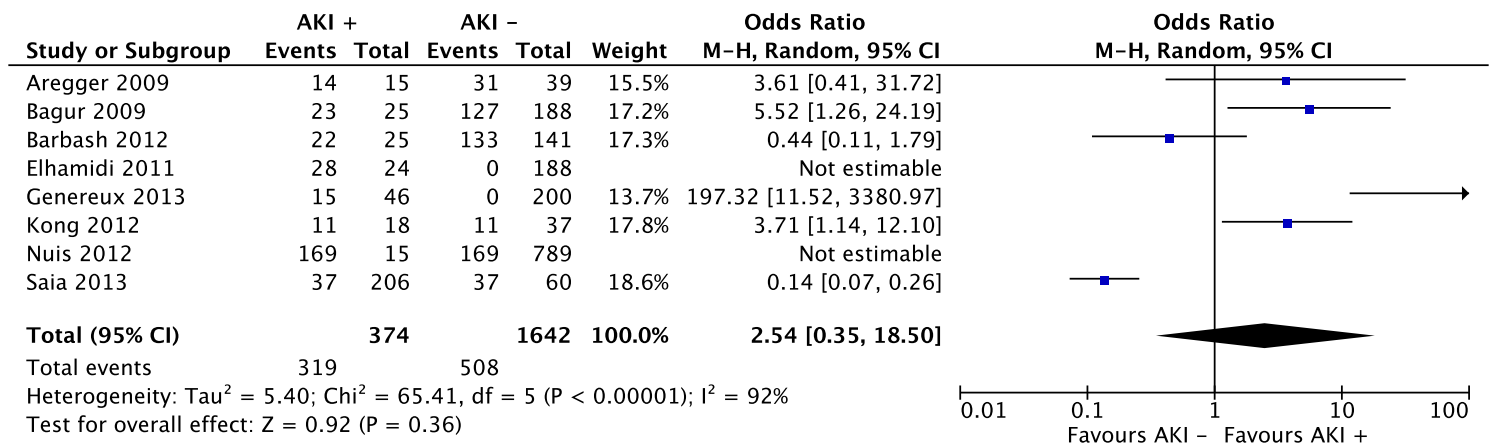

**Supplemental figure 7: Meta-analysis of male gender in predicting post-TAVR AKI**

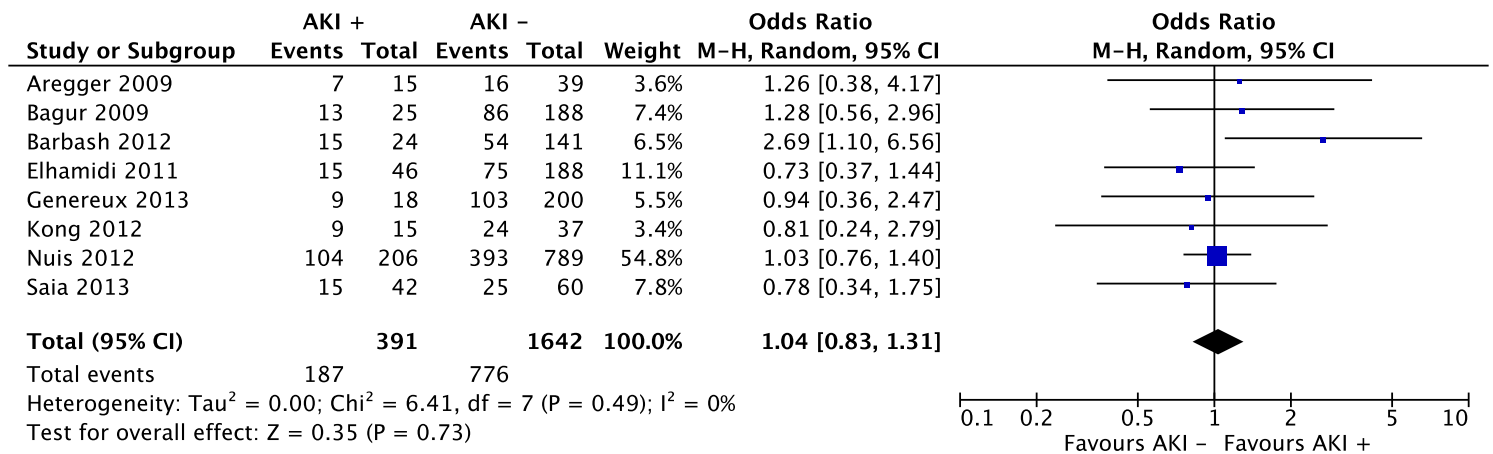

### Supplemental figure 8: Meta-analysis of peripheral vascular disease in predicting post-TAVR AKI

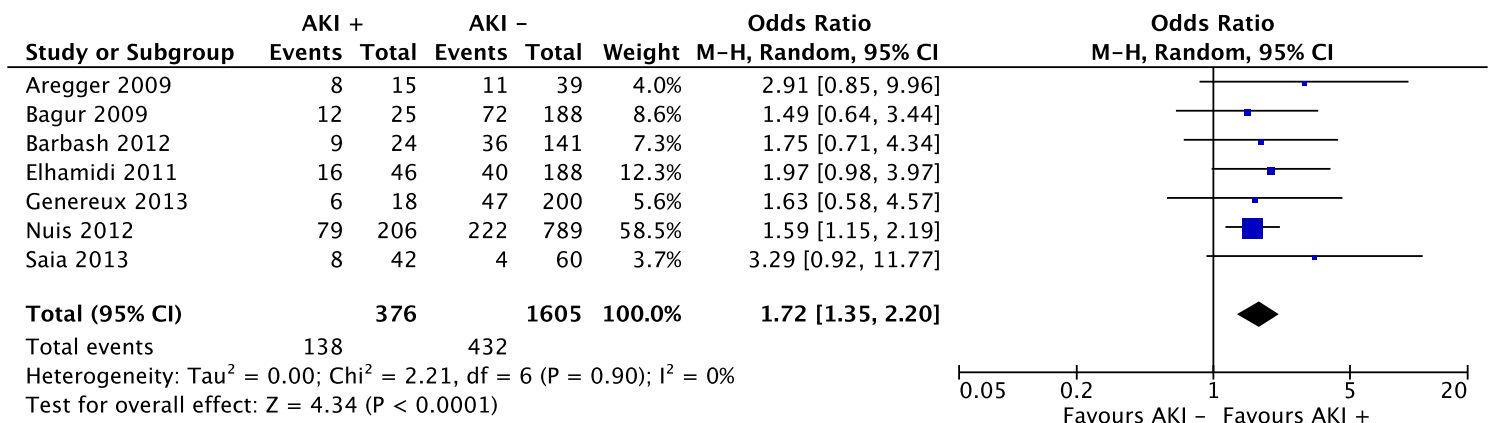



**Supplemental figure 9: Meta-analysis of smoking in predicting post-TAVR AKI**

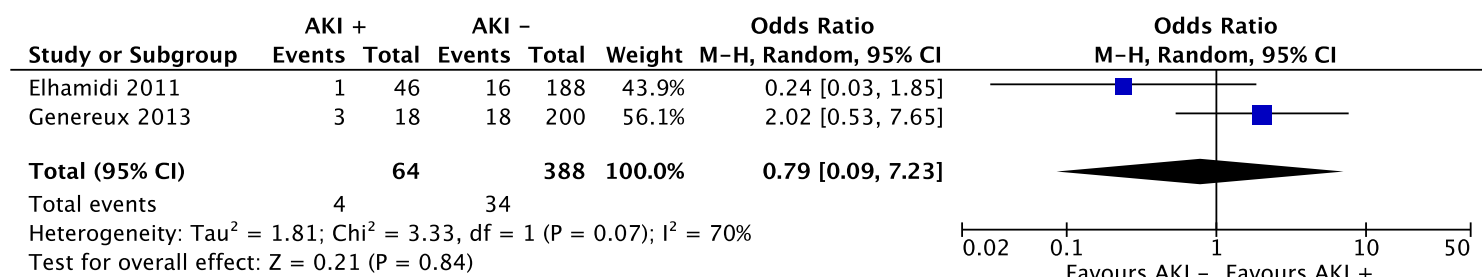

Supplement: f1 [file 3380605.f1.zip]
